# Supplementary material
Source: PubMed Central journal article supplement (PMC516535)

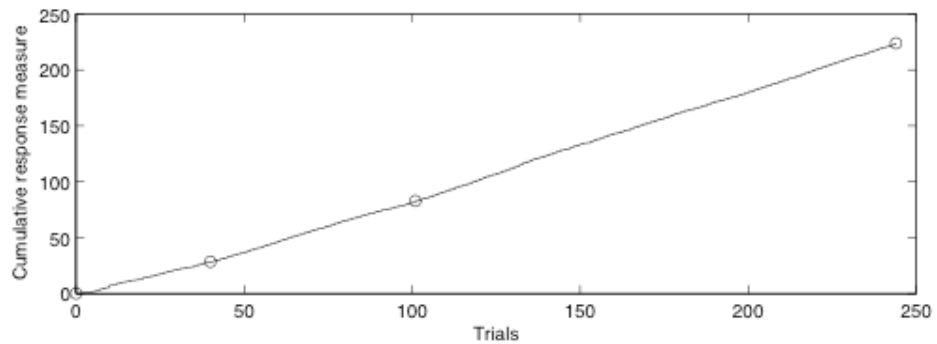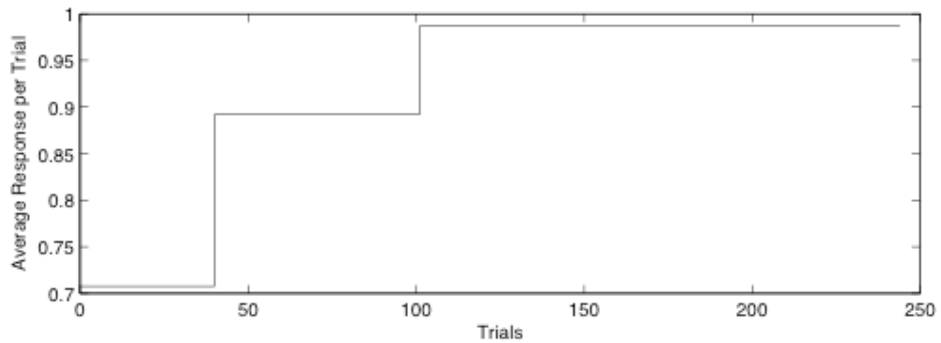

Supplement: pnas_101_36_13124__5.pdf [file pnas_101_36_13124__5.pdf]
